# Supplementary material for: Genome-wide recombination rate variation in a recombination map of cotton
Source: PubMed Central journal article supplement (PMC5703465; doi:10.1371/journal.pone.0188682), 2017-11-27
Supplement: pone.0188682.s001.pdf [file pone.0188682.s001.pdf]

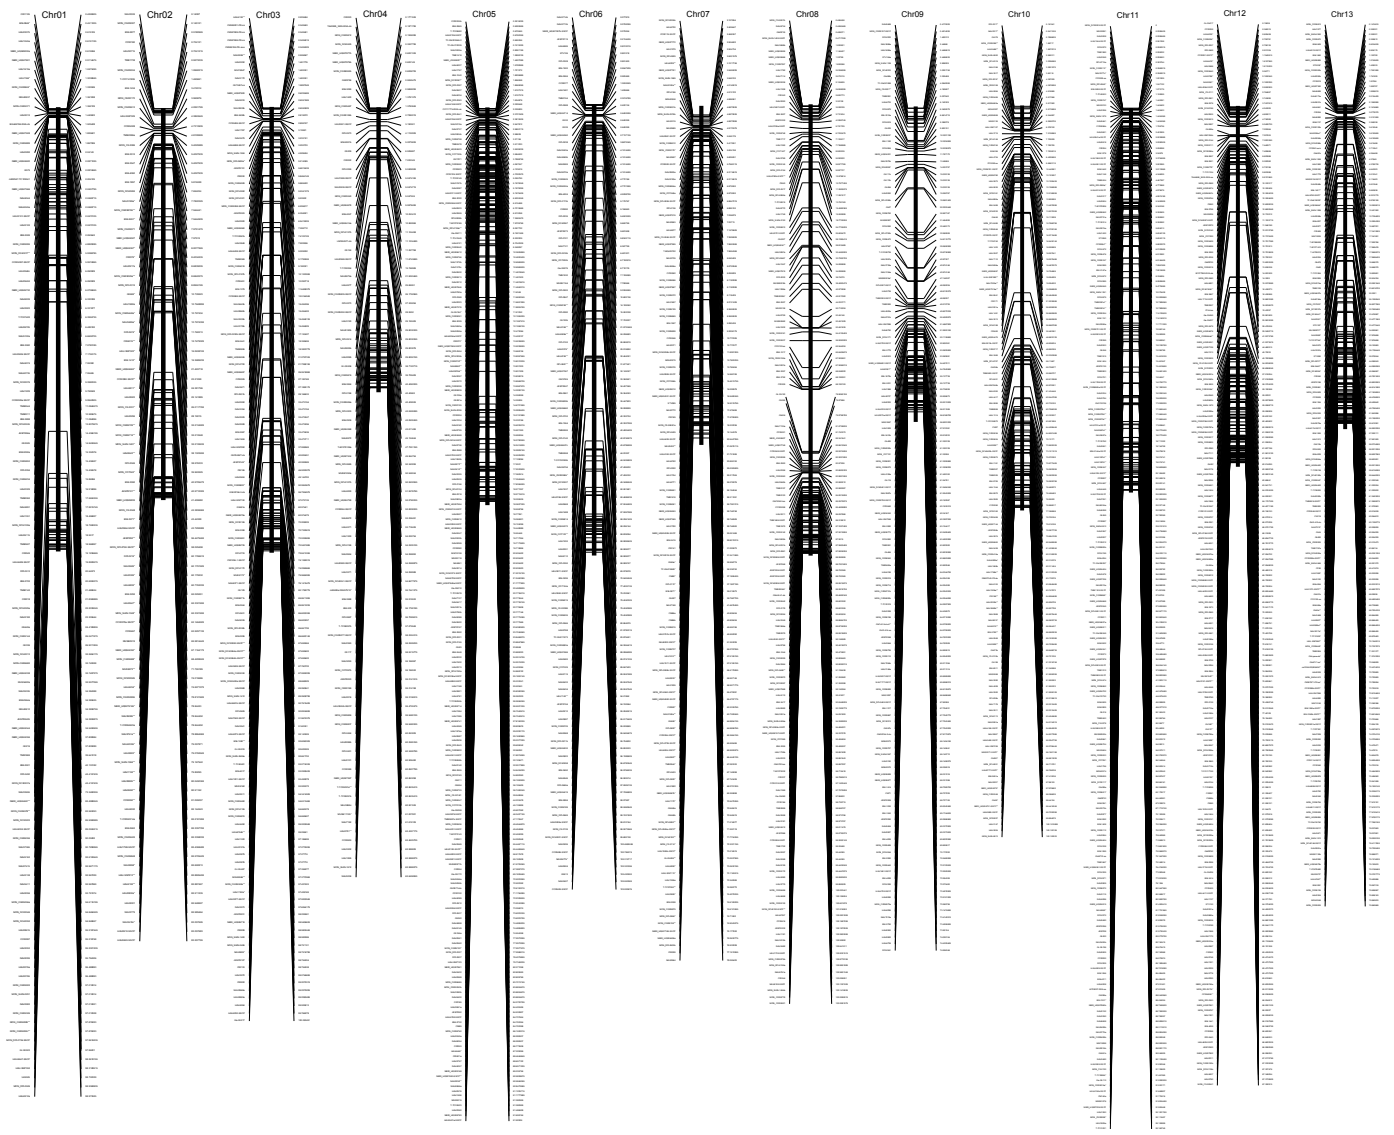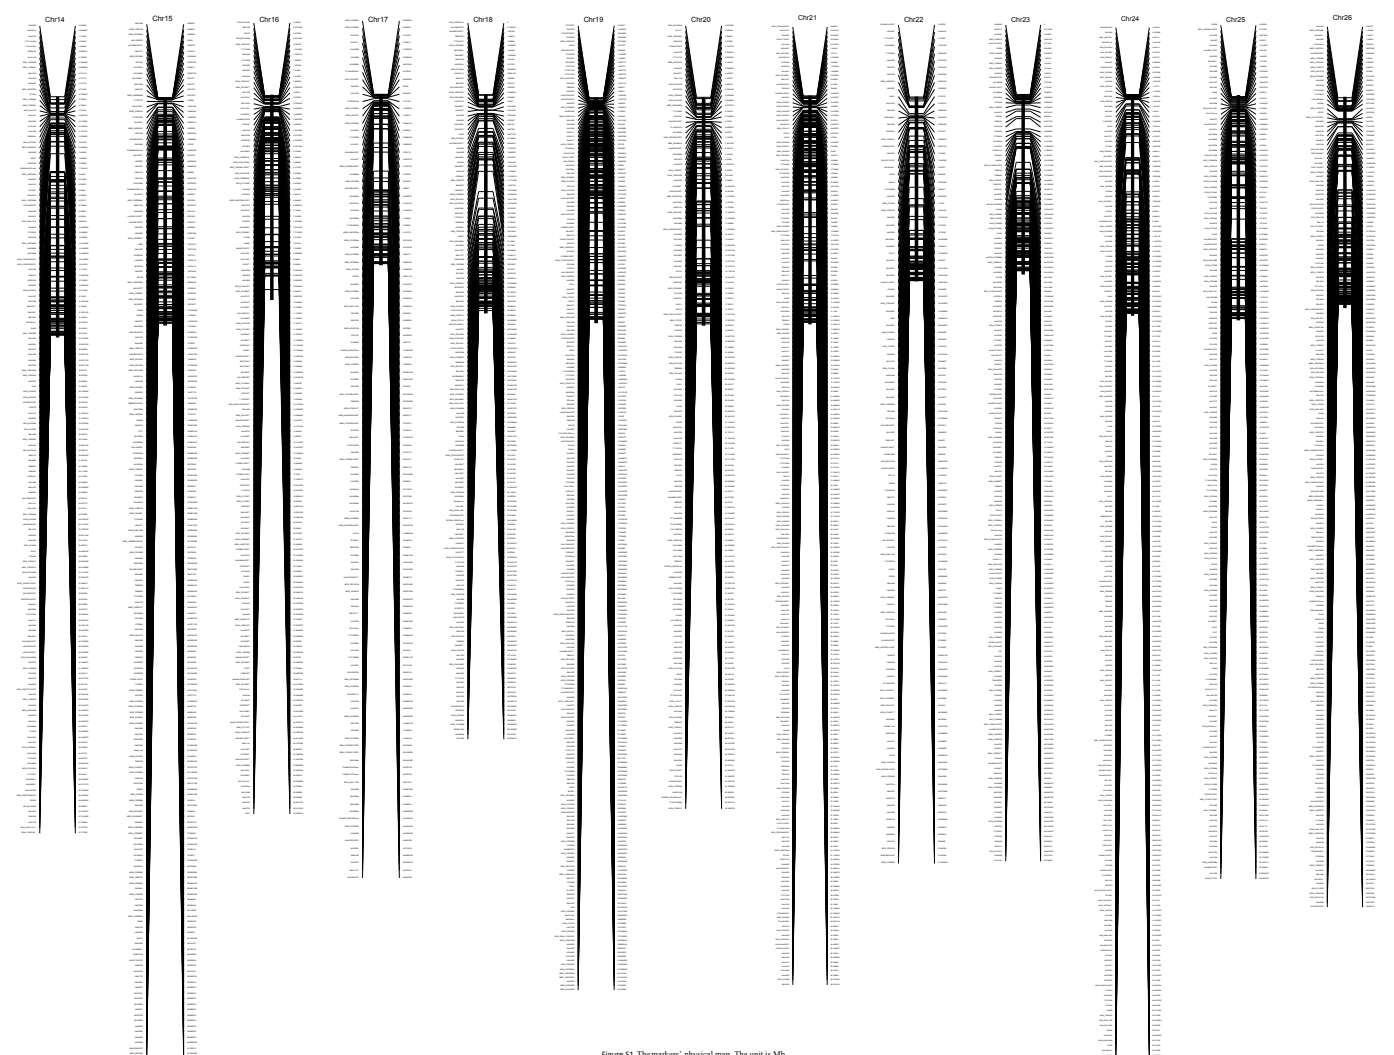

Figure 51 The markers' physical map. The unit is Mb.
